# Supplementary material for: The CD3 versus CD7 Plot in Multicolor Flow Cytometry Reflects Progression of Disease Stage in Patients Infected with HTLV-I
Source: PLoS One. 2013 Jan 22;8(1):e53728. doi: 10.1371/journal.pone.0053728 (PMC3551918; doi:10.1371/journal.pone.0053728)
Supplement: Table S1 — Clinical data in a case of chronic-type ATL (No. 53). Proportion of abonormal lymphocytes in the preipheral blood WBC were evaluated by morphological exmanination. LDH: Lactate dehydrogenase (normal range, 120–240 U/L) sIL-2R: soluble interleukin-2 receptor (normal range, 122–496 U/ml). (XLSX) [file pone.0053728.s004.xlsx]

## Sheet: Sheet1
Event	Day	WBC(/μl)	Lymphocytes(%)	Abnormal lymphocytes(%)	LDH(U/L)	sIL-2R(U/ml)
	-378	8200	43	2	/	/
FACS(1)	0	10160	43	10	/	/
FACS(2)	139	/	/	/	/	/
	209	9950	38.5	18	204	945
	321	27410	13	61.5	164	2040
FACS(3)	410	29500	10	67.5	281	/
low dose VP-16 start	482	51600	7	74.1	391	9110
FACS(4)	796	27230	8.4	65.4	633	/
